# Supplementary material
Source: publisher figshare collection journal article supplement (https://geolsoc.figshare.com/articles/dataset/_/3453908)

# Appendix C. Detailed release spectra analysis and dating figures

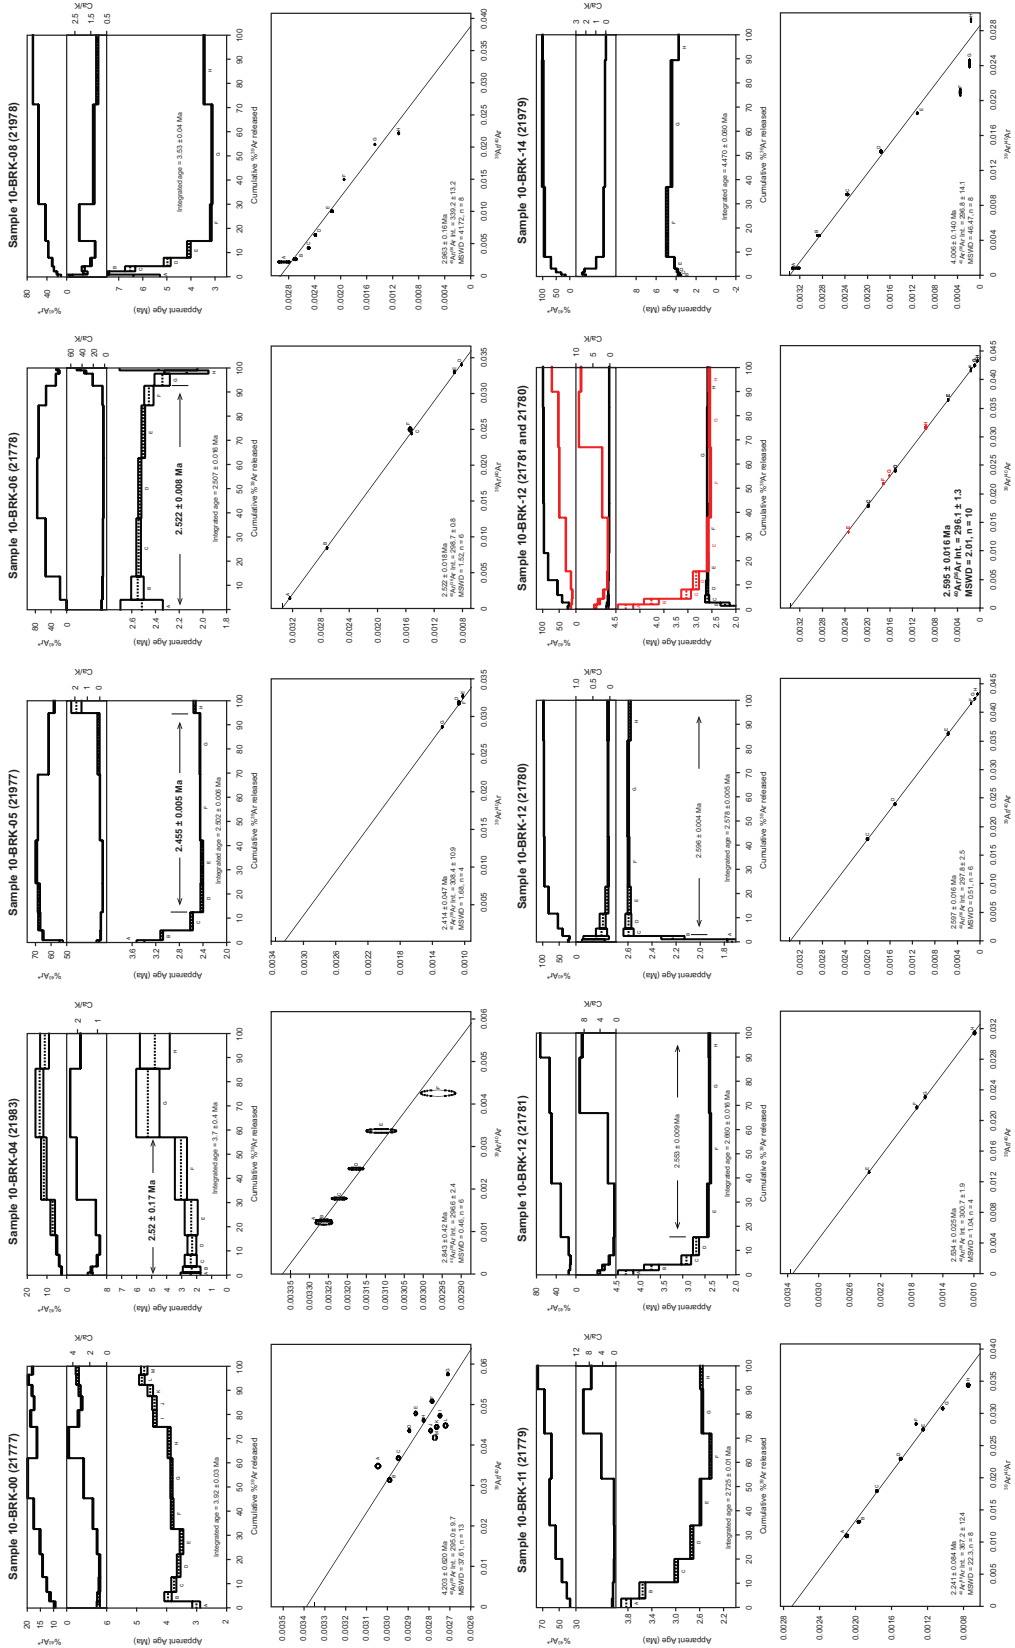

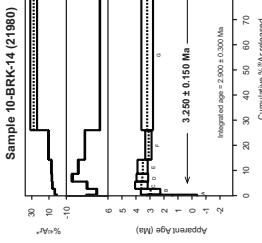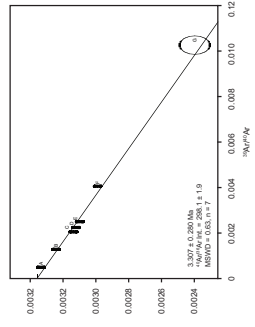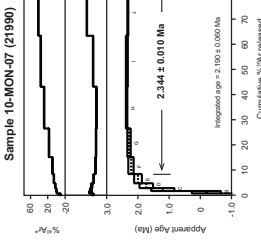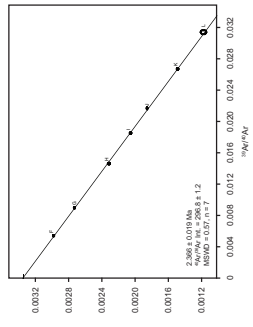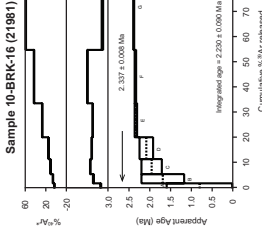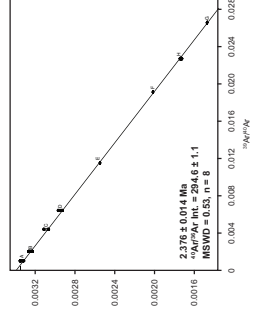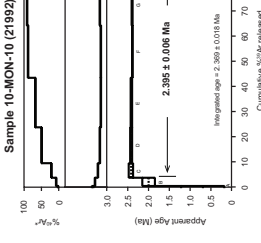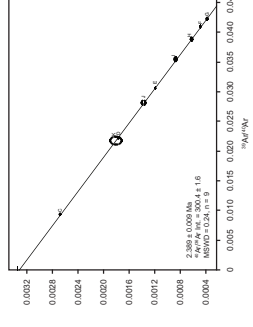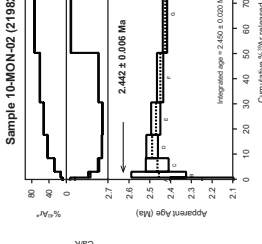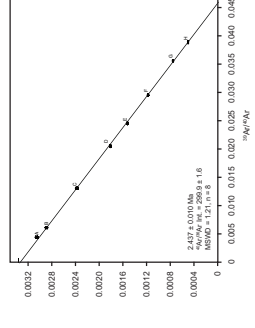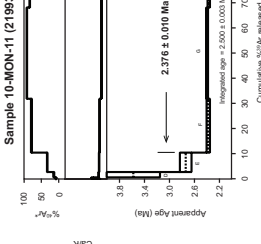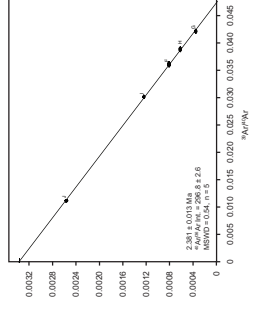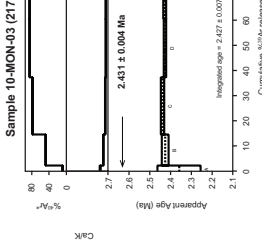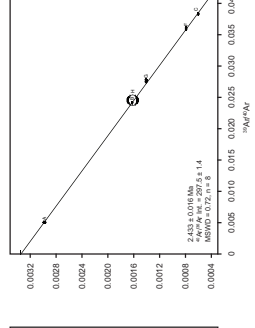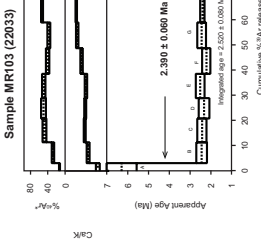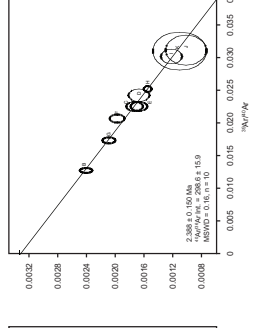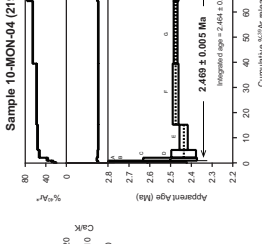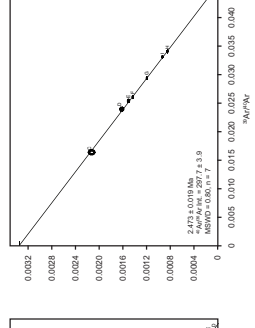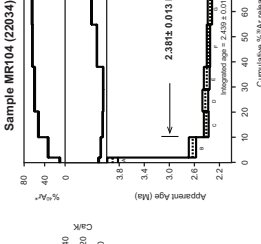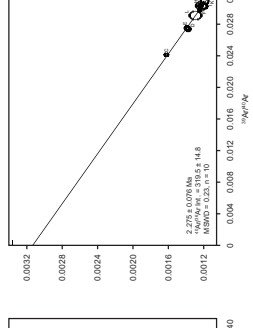

Sample MR220 (22045)

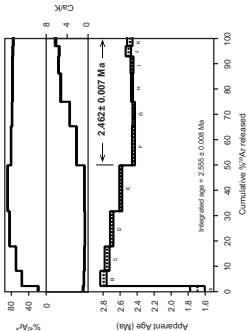

Sample MR226 (22046)

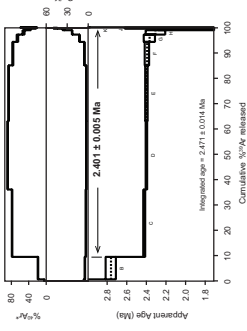

Sample MR10 (22035)

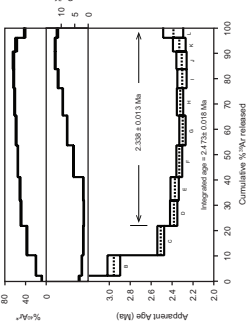

Sample MR240 (22047)

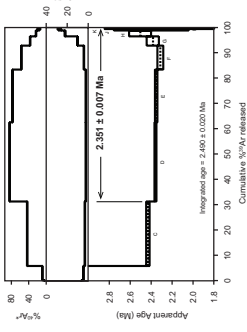

Sample 10-TRS-01 (22009)

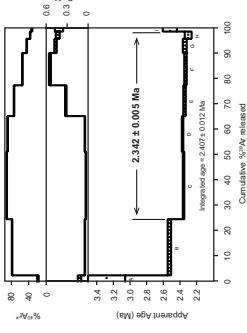

Sample 10-TRS-02 (22004)

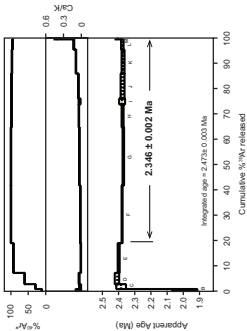

Sample 10-TRS-02 (22003)

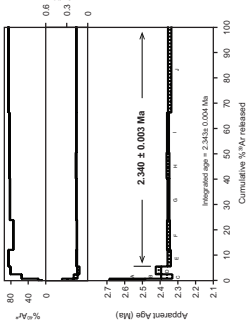

Sample 10-TRS-03 (21995)

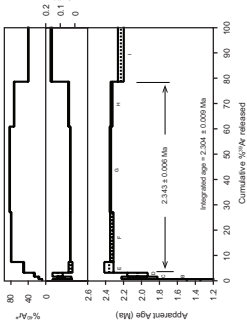

Sample 10-TRS-03 (21994)

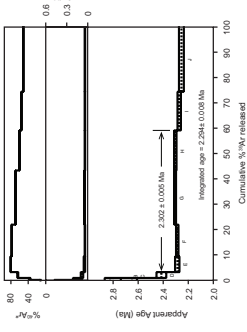

Sample 10-TRS-03 (21994 and 21995)

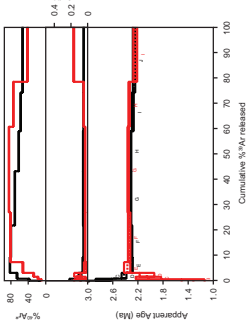

Sample 10-TRS-04 (22004)

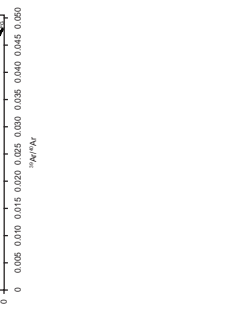

Sample 10-TRS-04 (22003)

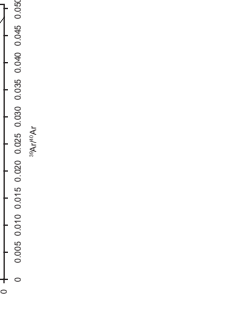

Sample 10-TRS-04 (21995)

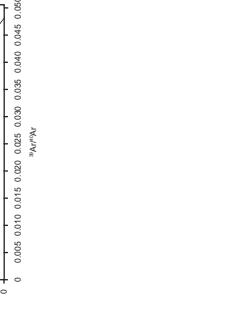

Sample 10-TRS-04 (21994)

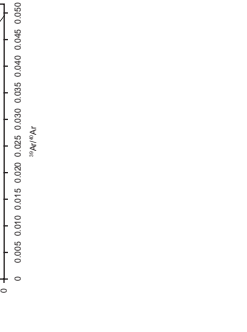

Sample 10-TRS-04 (21994 and 21995)

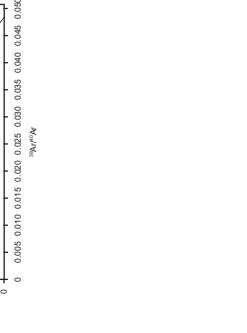

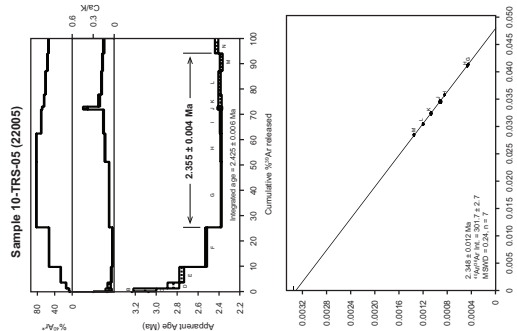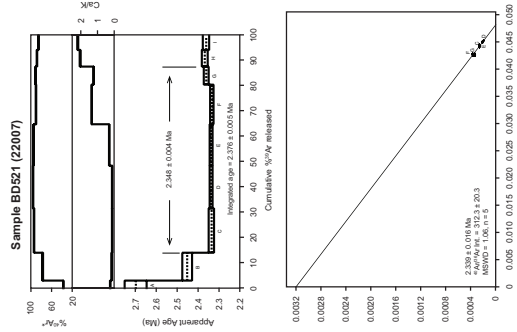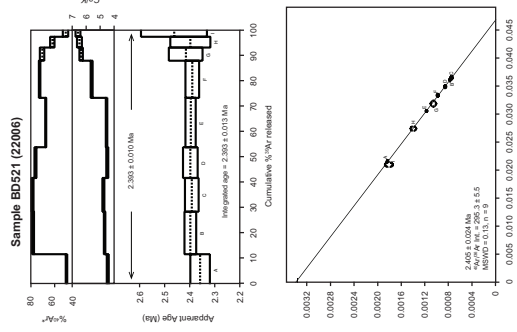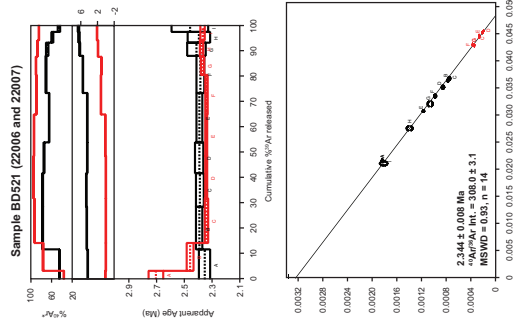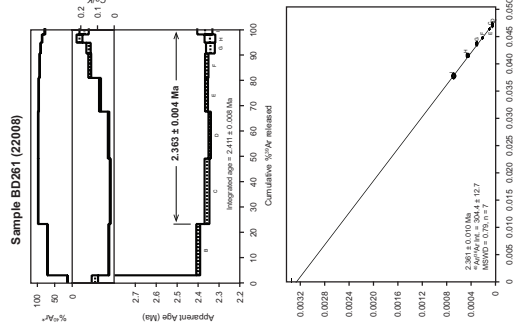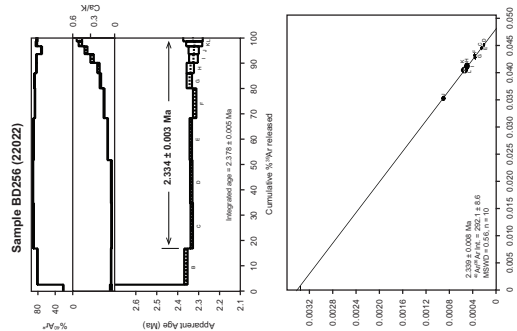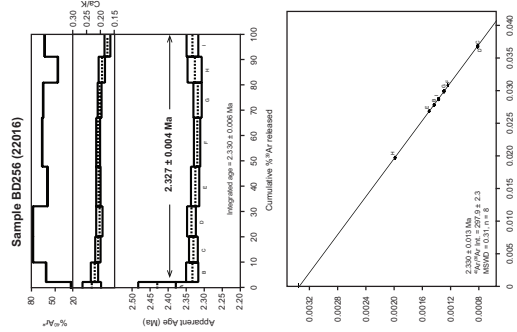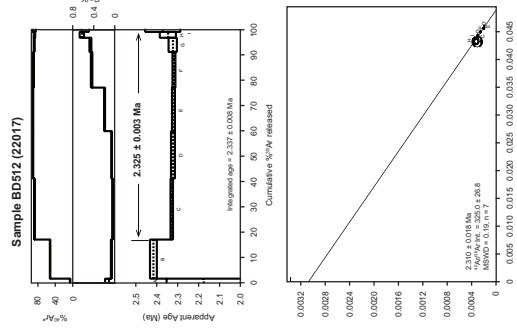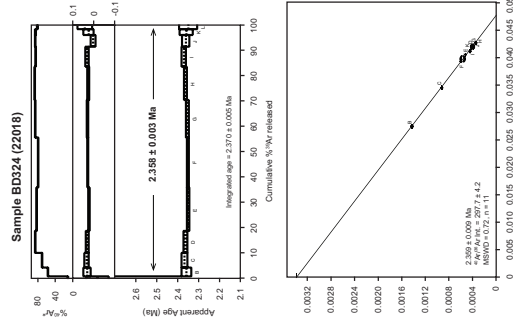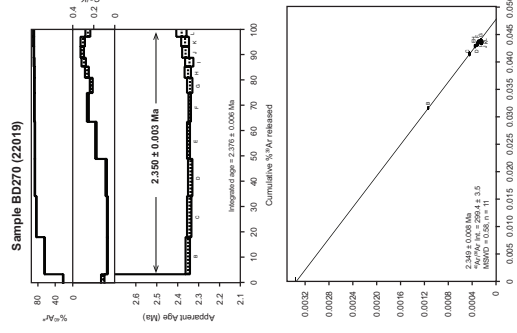

Sample BD306 (22020)

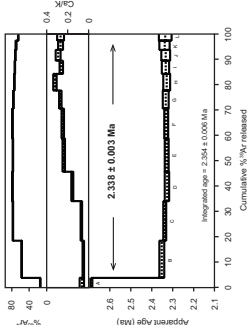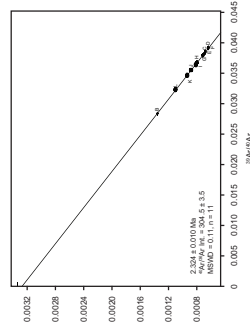

Sample BD306 (22021)

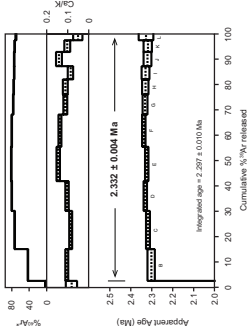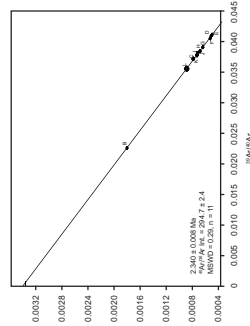

Sample BD510 (22030)

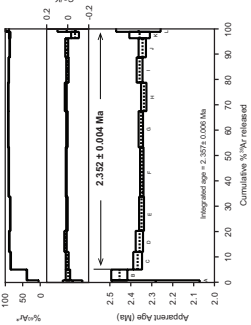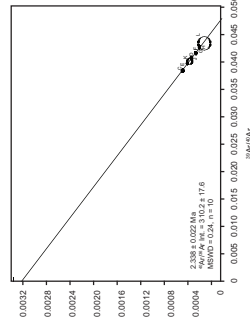

Sample 10-KTM-01 (21564)

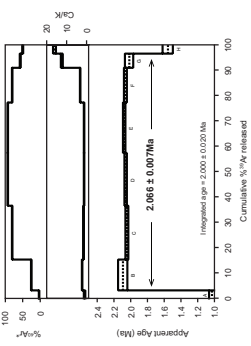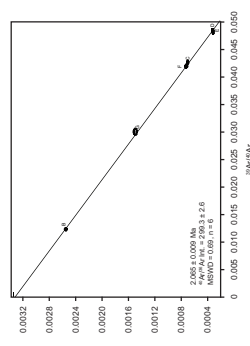

Sample 10-KTM-02 (21757)

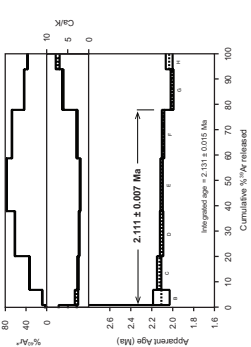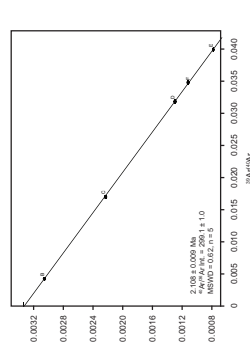

Sample 10-KTM-02 (21541)

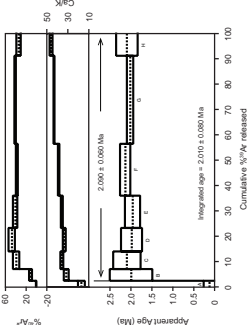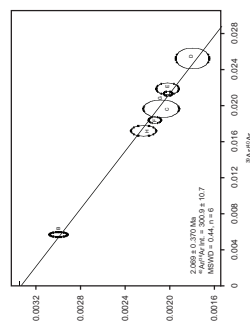

Sample 10-KTM-03 (21539)

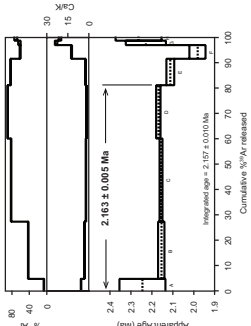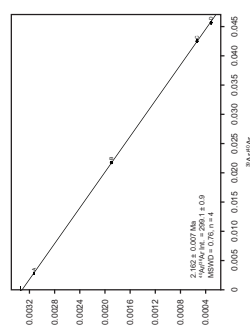

Sample 10-KTM-04 (21550)

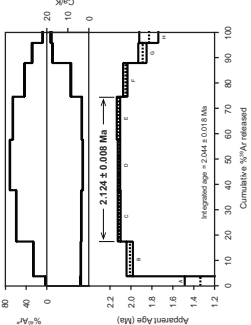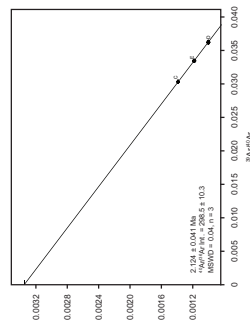

Sample 10-KTM-05 (21571)

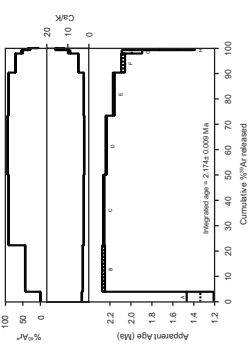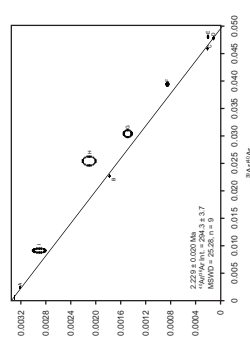

Sample 10-KTM-05 (21570)

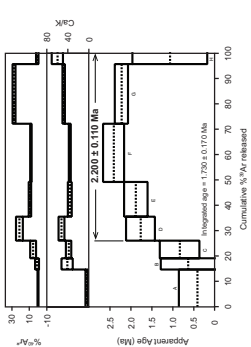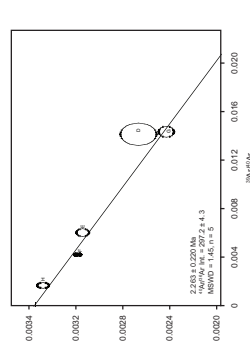

Sample KTG-4 (21551)

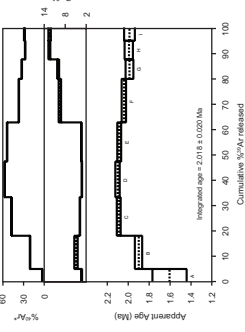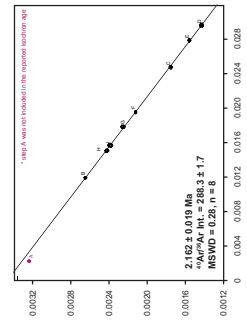

Sample KTG-4B (21553)

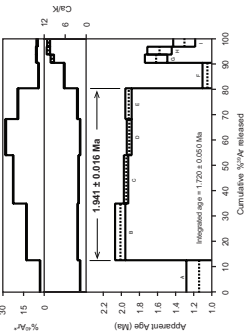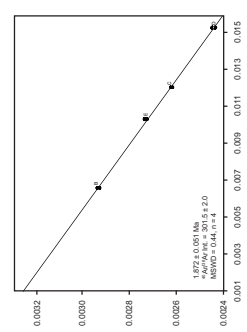

Sample KTG-3 (21554)

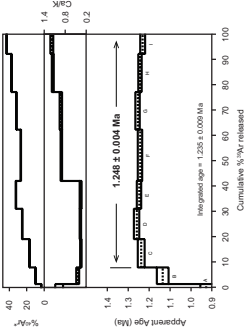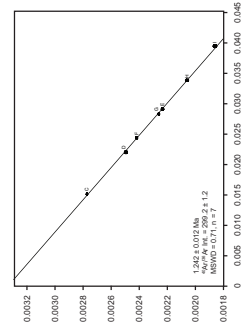

Sample KTT-2 (21537)

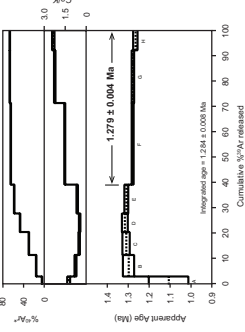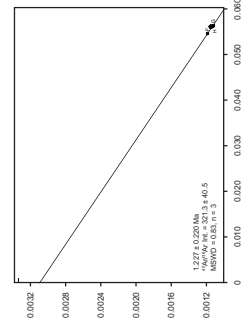

Sample KTT-3 (21566)

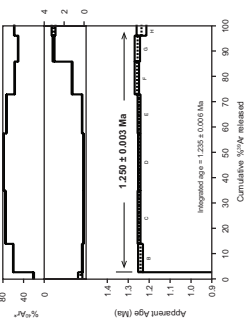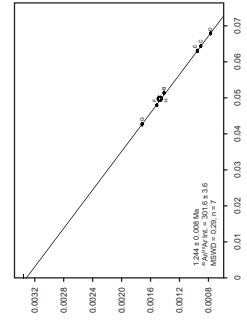

Sample KTW-2A (21575)

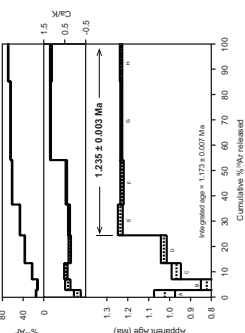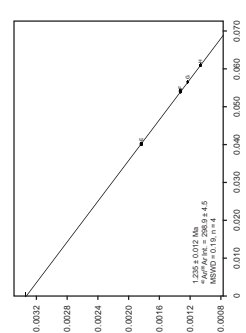

Sample KTW-3B (21572)

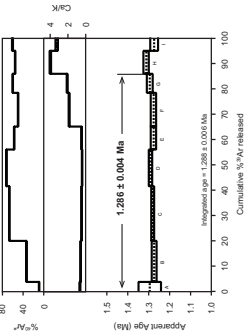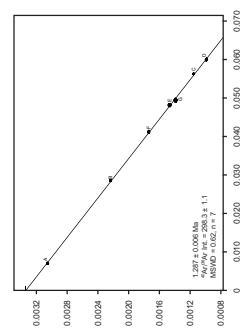

Sample 10-GEL-01 (21588)

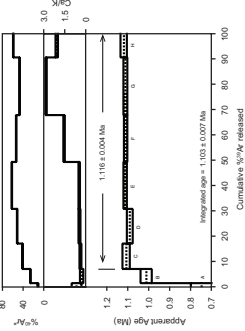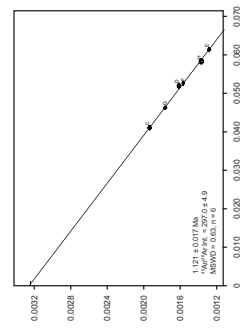

Sample 10-GEL-01 (21587)

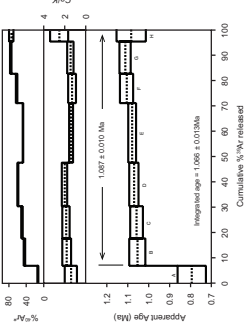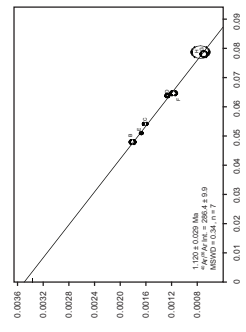

Sample 10-GEL-01 (21588 and 21587)

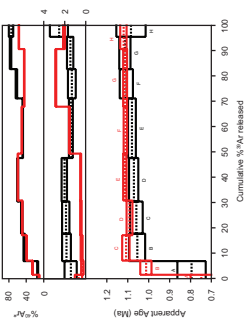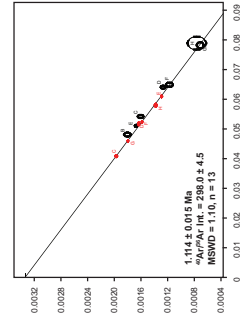

Sample 10-GEL-03 (21768)

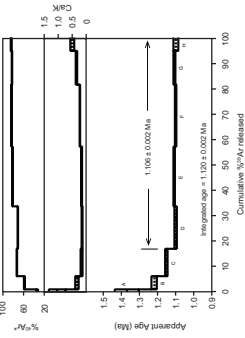

Sample 10-GEL-03 (21767)

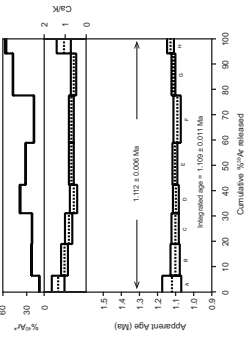

Sample 10-GEL-03 (21768 and 21767)

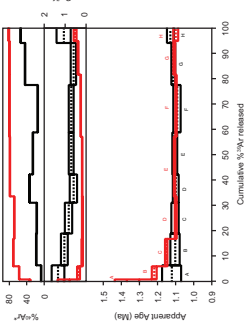

Sample 10-GEL-04 (21798)

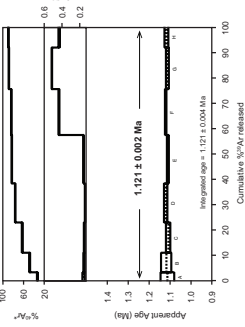

Sample 10-GEL-05 (21801)

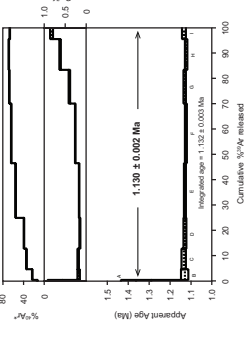

Sample 10-GEL-06 (21800)

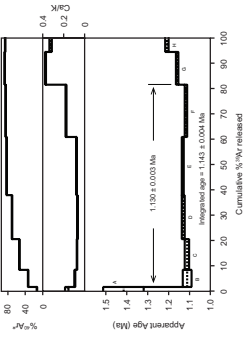

Sample 10-GEL-06 (21799)

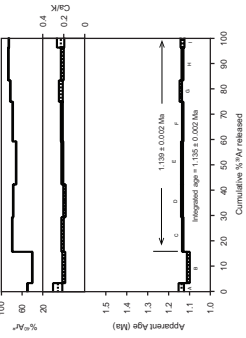

Sample 10-GEL-06 (21800 and 21799)

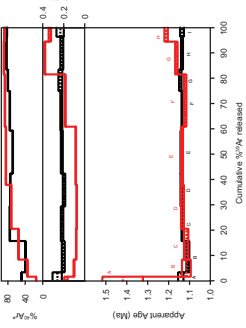

Sample 10-GEL-10 (21796)

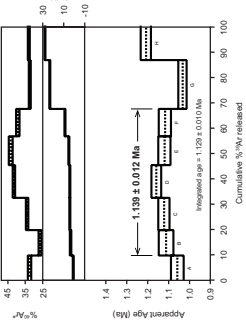

Sample 10-GEL-13 (21755)

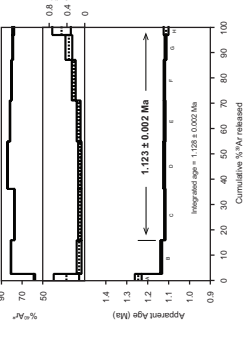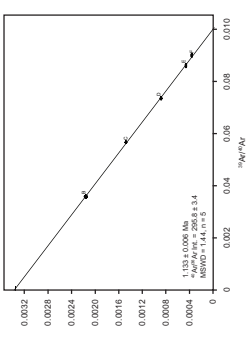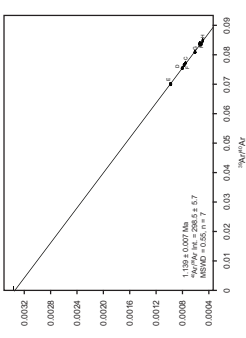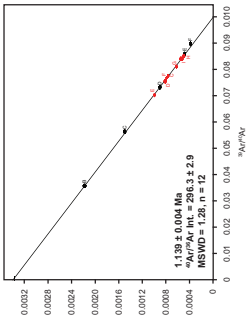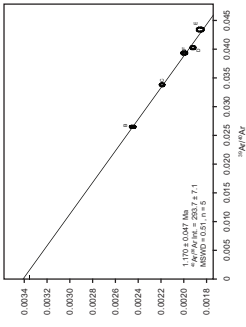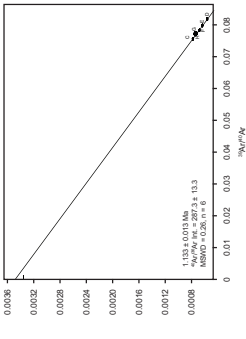

Sample 10-GEL-14 (21769)

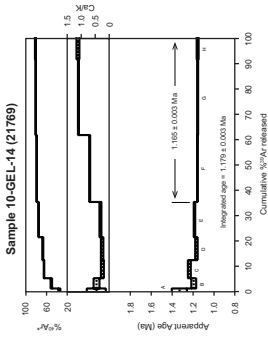

Sample 10-GEL-14 (21790)

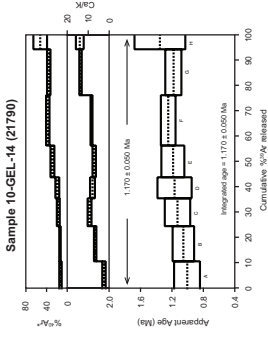

Sample 10-GEL-14 (21769 and 21790)

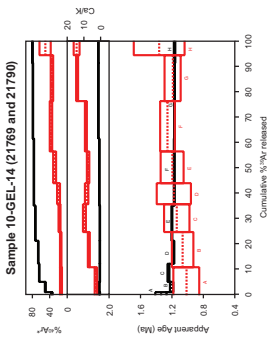

Sample 10-GEL-19 (21803)

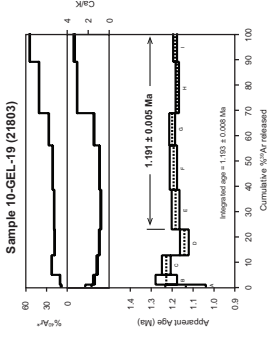

Sample 10-GEL-20 (21802)

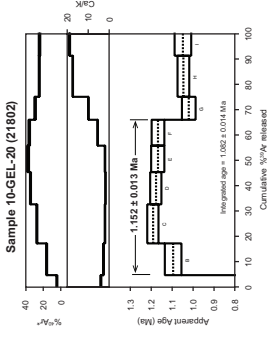

Sample MR69 (22031)

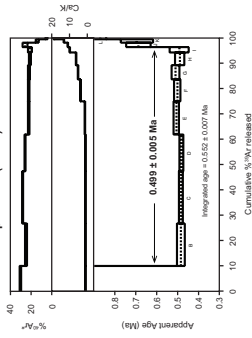

Sample MR92 (22032)

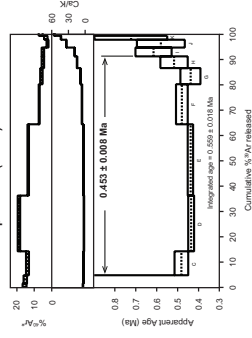

Sample MR154 (22043)

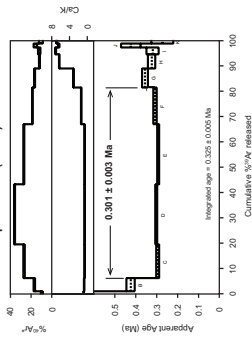

Sample MR2 (22036)

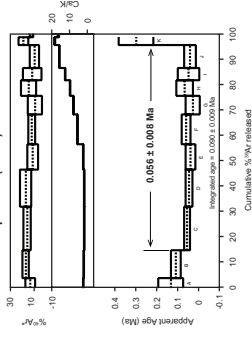

Sample MR168 (22044)

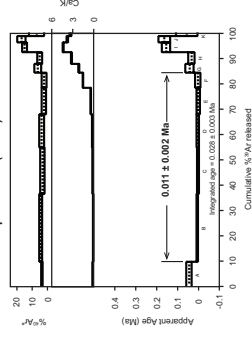

Sample MR69 (22031)

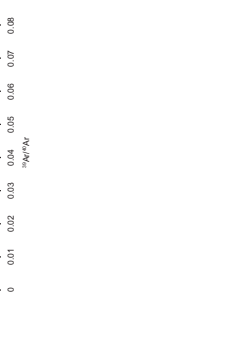

Sample MR92 (22032)

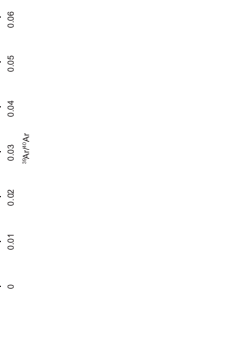

Sample MR154 (22043)

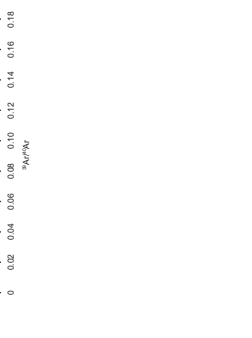

Sample MR2 (22036)

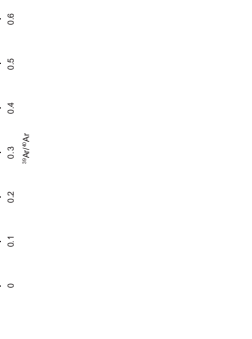

Sample MR168 (22044)

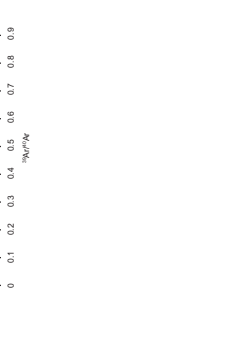



Sample MR260 (22048)

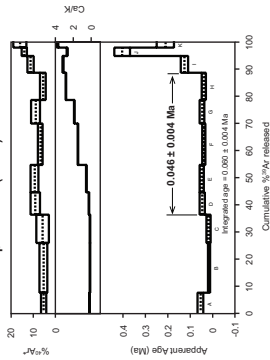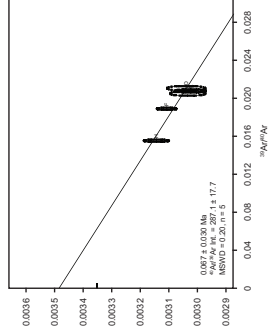

Sample 10-KER-04 (21765)

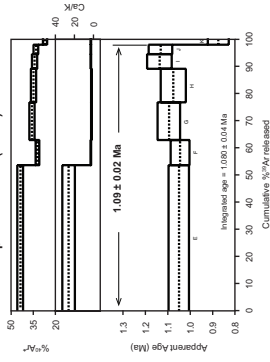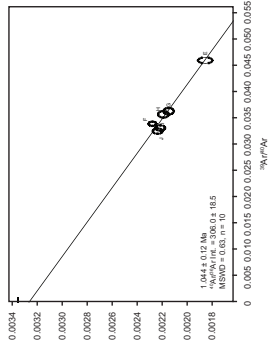

Sample 10-LOO-01 (21751)

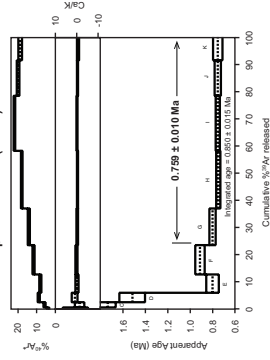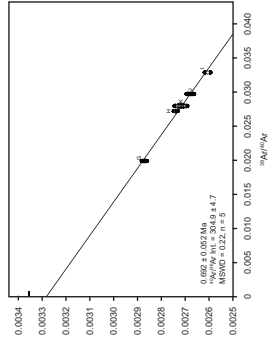

Sample 10-LOO-06 (21752)

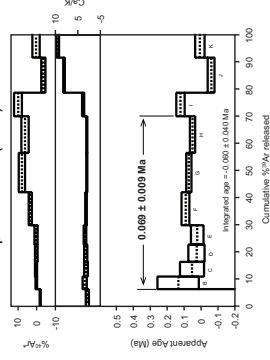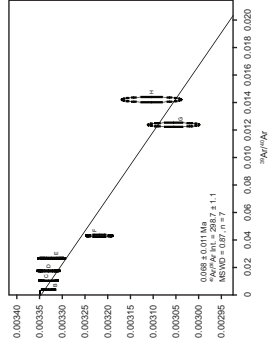

Supplement: Supplementary file 1 [file 1]
