# Supplementary material
Source: publisher figshare collection journal article supplement (https://geolsoc.figshare.com/articles/dataset/_/3453908)
Supplement: Supplementary file 2 [file 1]

**Appendix B.** Summary of recalculated  $^{40}\text{Ar}/^{39}\text{Ar}$  and K-Ar NTD ages

n.r. = not reported, GPS localities were converted using the website:

www.uwgb.edu/dutchs/UsefulData/ConvertUTMoOZ.HTM

FC2\* =  $28.02 \pm 0.16$  (Renne *et al.* 1998)

AC =  $1.194 \pm 0.012$  Ma (Renne *et al.* 1998)

FCT-3 =  $28.04 \pm 0.18$  Ma (Renne *et al.* 1994)

| Sample                    | LAT      | LONG     | Material dated  | Method        | Standard | Recalculated Age [Ma] | Reference                        |
|---------------------------|----------|----------|-----------------|---------------|----------|-----------------------|----------------------------------|
| <b>ESSIMINGOR</b>         |          |          |                 |               |          |                       |                                  |
| ESMT-2                    | -3.42436 | 36.05092 | matrix          | plateau       | FC2*     | $5.95 \pm 0.01$       | Mana <i>et al.</i> 2012          |
|                           |          |          | whole rock      | plateau       | FC2*     | $5.93 \pm 0.01$       | Mana <i>et al.</i> 2012          |
| ESMT-4                    | -3.42358 | 36.05192 | nepheline       | plateau       | FC2*     | $5.91 \pm 0.01$       | Mana <i>et al.</i> 2012          |
| ES14-2008                 | -3.42808 | 36.05444 | nepheline       | plateau       | FC2*     | $5.90 \pm 0.07$       | Mana <i>et al.</i> 2012          |
|                           |          |          | matrix          | plateau       | FC2*     | $5.86 \pm 0.02$       | Mana <i>et al.</i> 2012          |
| ES-8                      | -3.46478 | 35.99450 | whole rock      | plateau       | FC2*     | $5.89 \pm 0.02$       | Mana <i>et al.</i> 2012          |
| ES-18                     | -3.46362 | 36.00921 | whole rock      | plateau       | FC2*     | $5.83 \pm 0.01$       | Mana <i>et al.</i> 2012          |
| ES-3                      | -3.47224 | 35.99492 | whole rock      | plateau       | FC2*     | $5.80 \pm 0.02$       | Mana <i>et al.</i> 2012          |
| <b>SADIMAN</b>            |          |          |                 |               |          |                       |                                  |
| 01-SM-3                   | -3.19243 | 35.40268 | matrix          | plateau       | AC       | $4.66 \pm 0.05$       | Mollet <i>et al.</i> 2011        |
| 01-SM-5                   | -3.19159 | 35.41198 | matrix          | isochron      | AC       | $4.22 \pm 0.02$       | Mollet <i>et al.</i> 2011        |
| 04-NT-3                   | -3.30222 | 35.22927 | matrix          | isochron      | AC       | $4.05 \pm 0.02$       | Mollet <i>et al.</i> 2011        |
| <b>ENGELOSIN</b>          |          |          |                 |               |          |                       |                                  |
| ENGB                      | -2.90816 | 35.38344 | matrix          | isochron      | AC       | $2.99 \pm 0.02$       | Mollet <i>et al.</i> 2011        |
| <b>LEMAGRUT</b>           |          |          |                 |               |          |                       |                                  |
| 00-LM-6                   | -3.17588 | 35.39075 | matrix          | plateau       | FC2*     | $2.26 \pm 0.01$       | Mollet <i>et al.</i> 2011        |
| 00-LM-7                   | -3.17494 | 35.39086 | matrix          | plateau       | AC       | $2.27 \pm 0.01$       | Mollet <i>et al.</i> 2011        |
| 02-LM-4                   | -3.09797 | 35.33113 | matrix          | plateau       | FC2*     | $2.24 \pm 0.01$       | Mollet <i>et al.</i> 2011        |
| 04-OS-1, Osilale village  | -3.21938 | 35.28951 | anorthoclase    | plateau       | AC       | $2.23 \pm 0.10$       | Mollet <i>et al.</i> 2011        |
| 04-OS-3, Osilale village  | -3.22259 | 35.29458 | matrix          | plateau       | AC       | $2.42 \pm 0.01$       | Mollet <i>et al.</i> 2011        |
| 04-OS-4, Osilale village  | -3.22081 | 35.29602 | matrix          | plateau       | AC       | $2.30 \pm 0.004$      | Mollet <i>et al.</i> 2011        |
| <b>OGOL</b>               |          |          |                 |               |          |                       |                                  |
| 04-OG-1                   | -3.23186 | 35.16988 | matrix          | plateau       | AC       | $2.32 \pm 0.01$       | Mollet <i>et al.</i> 2011        |
| 04-OG-2                   | -3.21322 | 35.23270 | matrix          | plateau       | AC       | $2.28 \pm 0.05$       | Mollet <i>et al.</i> 2011        |
| <b>NGORONGORO</b>         |          |          |                 |               |          |                       |                                  |
| NG-DS                     |          | n.r.     | Anorthoclase    | SCLF          | FC2*     | $2.02 \pm 0.02$       | Mollet <i>et al.</i> 2008        |
| NG-AS                     |          | n.r.     | Anorthoclase    | SCLF          | FC2*     | $2.24 \pm 0.08$       | Mollet <i>et al.</i> 2008        |
| NG8                       |          | n.r.     | Matrix          | plateau       | FC2*     | $2.21 \pm 0.02$       | Mollet <i>et al.</i> 2008        |
| NG2                       |          | n.r.     | Matrix          | isochron      | FC2*     | $2.26 \pm 0.02$       | Mollet <i>et al.</i> 2008        |
| <b>OLMOTI</b>             |          |          |                 |               |          |                       |                                  |
| 00-OLT2                   | -3.02063 | 35.67649 | matrix          | plateau       | AC       | $2.02 \pm 0.04$       | Mollet <i>et al.</i> 2009        |
| 00-OLT5                   | -3.02009 | 35.67789 | matrix          | plateau       | AC       | $1.91 \pm 0.02$       | Mollet <i>et al.</i> 2009        |
| 03-OLT1                   | -3.03300 | 35.65111 | matrix          | plateau       | AC       | $1.86 \pm 0.01$       | Mollet <i>et al.</i> 2009        |
| 03-OLT2                   | -3.03342 | 35.65070 | matrix          | isochron      | AC       | $1.88 \pm 0.02$       | Mollet <i>et al.</i> 2009        |
| 03-OLT3                   | -3.03298 | 35.65213 | matrix          | plat. & isoch | AC       | $1.81 \pm 0.01$       | Mollet <i>et al.</i> 2009        |
| 04-OLT2                   | -3.03418 | 35.66463 | anorthoclase    | plat. & isoch | AC       | $1.86 \pm 0.03$       | Mollet <i>et al.</i> 2009        |
| 04-OLT4                   | -3.03290 | 35.66099 | matrix          | isochron      | AC       | $1.84 \pm 0.04$       | Mollet <i>et al.</i> 2009        |
| <b>OLDEANI</b>            |          |          |                 |               |          |                       |                                  |
| 03-OLDI-1                 | -3.32075 | 35.35181 | matrix          | plateau       | AC       | $1.53 \pm 0.02$       | Mollet <i>et al.</i> 2011        |
| 03-OLDI-2                 | -3.31225 | 35.35937 | matrix          | plateau       | AC       | $1.59 \pm 0.02$       | Mollet <i>et al.</i> 2011        |
| 03-OLDI-4                 | -3.31098 | 35.36428 | matrix          | plateau       | AC       | $1.62 \pm 0.01$       | Mollet <i>et al.</i> 2011        |
| 03-OLDI-5                 | -3.31246 | 35.36934 | matrix          | plateau       | AC       | $1.56 \pm 0.02$       | Mollet <i>et al.</i> 2011        |
| 04-OLDI-3                 | -3.25200 | 35.42758 | matrix          | isochron      | AC       | $1.58 \pm 0.03$       | Mollet <i>et al.</i> 2011        |
| 04-OLDI-4                 | -3.23682 | 35.41454 | matrix          | isochron      | AC       | $1.62 \pm 0.03$       | Mollet <i>et al.</i> 2011        |
| <b>LOLMALASIN</b>         |          |          |                 |               |          |                       |                                  |
| LS-3                      |          |          | matrix          | isochron      | FC2      | $1.32 \pm 0.03$       | Mollet <i>et al.</i> in progress |
| LL-8                      |          |          | matrix          | isochron      | FC2      | $1.36 \pm 0.02$       | Mollet <i>et al.</i> in progress |
| LL-13                     |          |          | matrix          | isochron      | FC2      | $1.36 \pm 0.04$       | Mollet <i>et al.</i> in progress |
| <b>EMBAGAI</b>            |          |          |                 |               |          |                       |                                  |
| EMB3                      | -2.88206 | 35.83999 | matrix          | isochron      | AC       | $1.17 \pm 0.04$       | Mollet <i>et al.</i> 2011        |
| EMB6                      | -2.90590 | 35.86115 | nepheline       | isochron      | AC       | $1.14 \pm 0.01$       | Mollet <i>et al.</i> 2011        |
|                           |          |          | matrix          | isochron      | AC       | $1.07 \pm 0.01$       | Mollet <i>et al.</i> 2011        |
| EMB5                      | -2.90545 | 35.86037 | matrix          | isochron      | AC       | $0.82 \pm 0.02$       | Mollet <i>et al.</i> 2011        |
| <b>OREMIT</b>             |          |          |                 |               |          |                       |                                  |
| S10-L9                    | -2.72834 | 35.98290 | groundmass      | plateau       | FCT-3    | $0.34 \pm 0.85$       | Sherrod <i>et al.</i> 2013       |
| <b>LOLMURWAK</b>          |          |          |                 |               |          |                       |                                  |
| S10-L40                   | -2.79847 | 35.97977 | phlogopite      | plateau       | FCT-3    | $0.93 \pm 0.07$       | Sherrod <i>et al.</i> 2013       |
| <b>OLDONYO LENGAI</b>     |          |          |                 |               |          |                       |                                  |
| S10-L103                  | -2.77178 | 35.94970 | alkali feldspar | plateau       | FCT-3    | $0.34 \pm 0.23$       | Sherrod <i>et al.</i> 2013       |
| S10-L236B                 | -2.75785 | 35.95010 | phlogopite      | plateau       | FCT-3    | $0.36 \pm 0.65$       | Sherrod <i>et al.</i> 2013       |
| S10-L136 debris avalanche | -2.55074 | 35.88750 | phlogopite      | plateau       | FCT-3    | $0.46 \pm 0.75$       | Sherrod <i>et al.</i> 2013       |
| S10-L65 debris avalanche  | -2.63733 | 35.98360 | phlogopite      | plateau       | FCT-3    | $0.78 \pm 0.63$       | Sherrod <i>et al.</i> 2013       |

**Appendix B. Continued**

Data from source publication converted where necessary, to K<sub>2</sub>O wt. % and <sup>40</sup>Ar<sub>rad</sub>, mol x 10<sup>-11</sup>.

Ages published before 1976 are recalculated using international standards for the isotopic abundance and decay rates (Steiger and Jäger, 1977)

The samples described without LAT-LONG information are plotted in Appendix D, when appropriate a map code is reported.

| Sample                                                 | LAT      | LONG     | Material dated       | K <sub>2</sub> O, wt.% | <sup>40</sup> Ar <sub>rad</sub> , mol x 10 <sup>-11</sup> | Recalculated Age [Ma] | Reference                    |
|--------------------------------------------------------|----------|----------|----------------------|------------------------|-----------------------------------------------------------|-----------------------|------------------------------|
| <b>MOSONIK</b>                                         |          |          |                      |                        |                                                           |                       |                              |
| KA1814                                                 | n.r.     |          | nephelinite          | 7.04                   | 4.820                                                     | 4.75 ± 0.07           | Isaac & Curtis 1974          |
| NATM89-07 (KA1188)                                     | -2.56370 | 35.84010 |                      | 4.43                   | 2.254                                                     | 3.53 ± 0.06           | Manega 1993                  |
| KA1757                                                 | n.r.     |          | biotite lava         | 8.27                   | 3.88                                                      | 3.26 ± 0.08           | Isaac & Curtis 1974          |
| <b>FAULTED REGIONAL FLOOD LAVAS, NORTH OF TAROSERO</b> |          |          |                      |                        |                                                           |                       |                              |
| 309                                                    | a        |          | olivine basalt       | 0.63                   | 0.222                                                     | 2.46 ± 0.62           | Macintrye <i>et al.</i> 1974 |
| 305                                                    | a        |          | sodic trachite       | 5.25                   | 1.753                                                     | 2.32 ± 0.06           | Macintrye <i>et al.</i> 1974 |
| 510                                                    | a        |          | sodic trachite       | 4.60                   | 1.503                                                     | 2.27 ± 0.10           | Macintrye <i>et al.</i> 1974 |
| 306                                                    | a        |          | sodic trachite       | 4.92                   | 1.602                                                     | 2.26 ± 0.06           | Macintrye <i>et al.</i> 1974 |
| <b>REGIONAL FLOOD LAVAS, SOUTH ARUSHA</b>              |          |          |                      |                        |                                                           |                       |                              |
| 3705                                                   | 14       |          | alkali basalt        | 1.37                   | 0.491                                                     | 2.49 ± 0.06           | Wilkinson <i>et al.</i> 1986 |
|                                                        |          |          |                      | 1.37                   | 0.482                                                     | 2.44 ± 0.06           | Wilkinson <i>et al.</i> 1986 |
| 3706                                                   | 14       |          | mugearite            | 1.82                   | 0.602                                                     | 2.30 ± 0.06           | Wilkinson <i>et al.</i> 1986 |
|                                                        |          |          |                      | 1.82                   | 0.589                                                     | 2.25 ± 0.04           | Wilkinson <i>et al.</i> 1986 |
| <b>TAROSERO (unfaulted)</b>                            |          |          |                      |                        |                                                           |                       |                              |
| 490                                                    | b        |          | sodic trachite       | 4.78                   | 1.532                                                     | 2.22 ± 0.06           | Macintrye <i>et al.</i> 1974 |
|                                                        |          |          |                      | 4.78                   | 1.444                                                     | 2.10 ± 0.04           | Macintrye <i>et al.</i> 1974 |
|                                                        |          |          |                      | 4.78                   | 1.398                                                     | 2.03 ± 0.03           | Macintrye <i>et al.</i> 1974 |
| 488                                                    | b        |          | sodic trachite       | 4.65                   | 1.321                                                     | 1.97 ± 0.04           | Macintrye <i>et al.</i> 1974 |
| <b>MONDULI (north slopes)</b>                          |          |          |                      |                        |                                                           |                       |                              |
| 136                                                    | -3.19444 | 36.46361 | olivine basalt       | 0.99                   | 0.305                                                     | 2.14 ± 0.06           | Evans <i>et al.</i> 1971     |
|                                                        |          |          |                      | 0.99                   | 0.319                                                     | 2.24 ± 0.05           | Evans <i>et al.</i> 1971     |
| <b>KETUMBEINE (south slopes)</b>                       |          |          |                      |                        |                                                           |                       |                              |
| 155                                                    | Y        |          | olivine basalt       | 1.73                   | 0.393                                                     | 1.58 ± 0.10           | Evans <i>et al.</i> 1971     |
|                                                        |          |          |                      | 1.73                   | 0.424                                                     | 1.70 ± 0.07           | Evans <i>et al.</i> 1971     |
| 156                                                    | Y        |          | olivine basalt       | 0.99                   | 0.256                                                     | 1.79 ± 0.08           | Evans <i>et al.</i> 1971     |
|                                                        |          |          |                      | 0.99                   | 0.276                                                     | 1.93 ± 0.08           | Evans <i>et al.</i> 1971     |
| <b>SHIRA</b>                                           |          |          |                      |                        |                                                           |                       |                              |
| 05KI07C                                                |          |          | trachybasalt         | 3.03                   | 0.840                                                     | 1.926 ± 0.041         | Nonnotte <i>et al.</i> 2008  |
| 05KI08B                                                |          |          | basanite             | 2.95                   | 0.839                                                     | 1.974 ± 0.042         | Nonnotte <i>et al.</i> 2008  |
| <b>RIFTING EVENT</b>                                   |          |          |                      |                        |                                                           |                       |                              |
| Eyasi Basin                                            |          |          |                      |                        |                                                           |                       |                              |
| 7c                                                     | -3.2647  | 35.2167  | ankaramite           | 1.54                   | 0.723                                                     | 3.08 ± 0.3            | Foster <i>et al.</i> 1997    |
| Matunginini                                            |          |          |                      |                        |                                                           |                       |                              |
| 304                                                    | d        |          | olivine basalt       | 0.83                   | 0.245                                                     | 2.06 ± 0.50           | Macintrye <i>et al.</i> 1974 |
| Ardai                                                  |          |          |                      |                        |                                                           |                       |                              |
| 191                                                    | c        |          | olivine basalt       | 3.43                   | 0.849                                                     | 1.72 ± 0.08           | Macintrye <i>et al.</i> 1974 |
|                                                        |          |          |                      | 3.43                   | 0.897                                                     | 1.81 ± 0.11           | Macintrye <i>et al.</i> 1974 |
| Narabala                                               |          |          |                      |                        |                                                           |                       |                              |
| 139                                                    | e        |          | olivine trachybasalt | 3.45                   | 0.633                                                     | 1.28 ± 0.03           | Macintrye <i>et al.</i> 1974 |
|                                                        |          |          |                      | 3.45                   | 0.610                                                     | 1.23 ± 0.04           | Macintrye <i>et al.</i> 1974 |
|                                                        |          |          |                      | 3.45                   | 0.599                                                     | 1.21 ± 0.05           | Macintrye <i>et al.</i> 1974 |
| Manyara basin (foot of Kitete escarpment)              |          |          |                      |                        |                                                           |                       |                              |
| S13/3                                                  | -3.19260 | 35.94010 | basalt               | 0.84                   | 0.143                                                     | 1.02 ± 0.1            | Foster <i>et al.</i> 1997    |
|                                                        |          |          |                      | 0.84                   | 0.103                                                     |                       | Foster <i>et al.</i> 1997    |
| S14/5                                                  | -3.17820 | 35.93740 | basalt               | 2.39                   | 0.451                                                     | 1.24 ± 0.06           | Foster <i>et al.</i> 1997    |
|                                                        |          |          |                      | 2.39                   | 0.402                                                     |                       | Foster <i>et al.</i> 1997    |
| Natron basin (Ol Kerii escarpment)                     |          |          |                      |                        |                                                           |                       |                              |
| S13/2                                                  | -3.09770 | 36.02420 | olivine basalt       | 2.07                   | 0.370                                                     | 1.26 ± 0.07           | Foster <i>et al.</i> 1997    |
|                                                        |          |          |                      | 2.07                   | 0.379                                                     |                       | Foster <i>et al.</i> 1997    |
| <b>KISETEY</b>                                         |          |          |                      |                        |                                                           |                       |                              |
| 3                                                      | h        |          | phlogopite           | 0.76                   | 4.10                                                      | 0.59 ± 0.15           | Macintrye <i>et al.</i> 1974 |
|                                                        |          |          | phlogopite           | 0.19                   | 1.00                                                      | 0.14 ± 0.15           | Macintrye <i>et al.</i> 1974 |
| <b>LOOLMURWAK</b>                                      |          |          |                      |                        |                                                           |                       |                              |
| 891                                                    | i        |          | phlogopite           | 0.73                   | 5.60                                                      | 0.55 ± 0.10           | Macintrye <i>et al.</i> 1974 |
|                                                        |          |          | phlogopite           | 0.56                   | 4.30                                                      | 0.42 ± 0.10           | Macintrye <i>et al.</i> 1974 |
| <b>BURKO (SE slopes)</b>                               |          |          |                      |                        |                                                           |                       |                              |
| 137                                                    | -3.31528 | 36.21306 | nephelinite          | 3.64                   | 0.540                                                     | 1.03 ± 0.04           | Evans <i>et al.</i> 1971     |
|                                                        |          |          |                      | 3.64                   | 0.486                                                     | 0.93 ± 0.03           | Evans <i>et al.</i> 1971     |

## Appendix B. Continued

| Sample                      | LAT     | LONG    | Material dated         | K <sub>2</sub> O, wt.% | <sup>40</sup> Ar <sub>rad</sub> , mol x 10 <sup>-11</sup> | Recalculated Age [Ma] | Reference                    |
|-----------------------------|---------|---------|------------------------|------------------------|-----------------------------------------------------------|-----------------------|------------------------------|
| <b>GELAI (south slopes)</b> |         |         |                        |                        |                                                           |                       |                              |
| 138                         | X       |         | nephelinite            | 2.39                   | 0.338                                                     | 0.98 ± 0.03           | Evans <i>et al.</i> 1971     |
|                             |         |         |                        | 2.39                   | 0.349                                                     | 1.01 ± 0.03           | Evans <i>et al.</i> 1971     |
| <b>MAWENZI</b>              |         |         |                        |                        |                                                           |                       |                              |
| 05KI43B                     |         |         | trachybasalt           | 2.87                   | 0.203                                                     | 0.492 ± 0.011         | Nonnotte <i>et al.</i> 2008  |
| 05KI45                      |         |         | trachybasalt           | 2.66                   | 0.187                                                     | 0.488 ± 0.011         | Nonnotte <i>et al.</i> 2008  |
| <b>KIBO</b>                 |         |         |                        |                        |                                                           |                       |                              |
| 05KI14                      |         |         | phono-tephrite         | 3.98                   | 0.276                                                     | 0.482 ± 0.010         | Nonnotte <i>et al.</i> 2008  |
| 05KI05A                     |         |         | phonolite              | 5.68                   | 0.294                                                     | 0.359 ± 0.008         | Nonnotte <i>et al.</i> 2008  |
| 05KI03A                     |         |         | phonolite              | 5.68                   | 0.285                                                     | 0.348 ± 0.007         | Nonnotte <i>et al.</i> 2008  |
| 05KI29                      |         |         | phonolite              | 5.48                   | 0.273                                                     | 0.346 ± 0.008         | Nonnotte <i>et al.</i> 2008  |
| 05KI32                      |         |         | phonolite              | 5.72                   | 0.282                                                     | 0.343 ± 0.007         | Nonnotte <i>et al.</i> 2008  |
| 05KI37                      |         |         | phonolite              | 5.73                   | 0.280                                                     | 0.339 ± 0.007         | Nonnotte <i>et al.</i> 2008  |
| 05KI30                      |         |         | phonolite              | 5.69                   | 0.276                                                     | 0.337 ± 0.007         | Nonnotte <i>et al.</i> 2008  |
| 05KI17                      |         |         | phonolite              | 5.46                   | 0.215                                                     | 0.274 ± 0.006         | Nonnotte <i>et al.</i> 2008  |
| 05KI12                      |         |         | phonolite              | 5.62                   | 0.209                                                     | 0.258 ± 0.006         | Nonnotte <i>et al.</i> 2008  |
| 05KI38B                     |         |         | phonolite              | 5.71                   | 0.186                                                     | 0.227 ± 0.005         | Nonnotte <i>et al.</i> 2008  |
| 05KI24                      |         |         | phonolite              | 5.50                   | 0.166                                                     | 0.209 ± 0.005         | Nonnotte <i>et al.</i> 2008  |
| <b>PARASITIC ACTIVITY</b>   |         |         |                        |                        |                                                           |                       |                              |
| 05KI41B                     |         |         | basanite               | 2.05                   | 0.057                                                     | 0.195 ± 0.005         | Nonnotte <i>et al.</i> 2008  |
| 03T242B                     |         |         | basanite               | 2.23                   | 0.053                                                     | 0.165 ± 0.005         | Nonnotte <i>et al.</i> 2008  |
| <b>MERU WEST scarp</b>      |         |         |                        |                        |                                                           |                       |                              |
| 3436                        | 12      |         | phonolitic nephelinite | 3.94                   | 0.870                                                     | 1.53 ± 0.03           | Wilkinson <i>et al.</i> 1986 |
|                             |         |         |                        | 3.94                   | 0.843                                                     | 1.49 ± 0.03           | Wilkinson <i>et al.</i> 1986 |
| <b>N of Naigonesoit</b>     |         |         |                        |                        |                                                           |                       |                              |
| 3193                        | 11      |         | trachytoid phonolite   | 5.29                   | 0.292                                                     | 0.383 ± 0.009         | Wilkinson <i>et al.</i> 1986 |
|                             |         |         |                        | 5.29                   | 0.291                                                     | 0.383 ± 0.009         | Wilkinson <i>et al.</i> 1986 |
| <b>MERU WEST scarp</b>      |         |         |                        |                        |                                                           |                       |                              |
| Oi doinyo Sambu             |         |         |                        |                        |                                                           |                       |                              |
| 3912                        | 10      |         | phonolite              | 4.30                   | 0.193                                                     | 0.311 ± 0.011         | Wilkinson <i>et al.</i> 1986 |
|                             |         |         |                        | 4.30                   | 0.186                                                     | 0.300 ± 0.011         | Wilkinson <i>et al.</i> 1986 |
| 3303                        | 10      |         | phonolitic nephelinite | 4.37                   | 0.197                                                     | 0.313 ± 0.009         | Wilkinson <i>et al.</i> 1986 |
|                             |         |         |                        | 4.37                   | 0.191                                                     | 0.303 ± 0.010         | Wilkinson <i>et al.</i> 1986 |
|                             |         |         |                        | 4.37                   | 0.188                                                     | 0.299 ± 0.010         | Wilkinson <i>et al.</i> 1986 |
| Little Meru                 |         |         |                        |                        |                                                           |                       |                              |
| 3127 (clast from breccia)   | 9       |         | phonolitic nephelinite | 4.54                   | 0.183                                                     | 0.281 ± 0.005         | Wilkinson <i>et al.</i> 1986 |
| Naigonesoit tholoid         |         |         |                        | 4.54                   | 0.179                                                     | 0.273 ± 0.006         | Wilkinson <i>et al.</i> 1986 |
| 3203                        | 8       |         | sanidine phonolite     | 5.52                   | 0.142                                                     | 0.179 ± 0.010         | Wilkinson <i>et al.</i> 1986 |
|                             |         |         |                        | 5.52                   | 0.134                                                     | 0.168 ± 0.009         | Wilkinson <i>et al.</i> 1986 |
|                             |         |         |                        | 5.52                   | 0.126                                                     | 0.158 ± 0.010         | Wilkinson <i>et al.</i> 1986 |
| NW flanks of Meru           |         |         |                        |                        |                                                           |                       |                              |
| 4191                        | 7       |         | nephelinite            | 3.87                   | 0.083                                                     | 0.148 ± 0.013         | Wilkinson <i>et al.</i> 1986 |
|                             |         |         |                        | 3.87                   | 0.083                                                     | 0.148 ± 0.010         | Wilkinson <i>et al.</i> 1986 |
| 4231                        | 6       |         | phonolitic tephrite    | 4.01                   | 0.064                                                     | 0.111 ± 0.007         | Wilkinson <i>et al.</i> 1986 |
|                             |         |         |                        | 4.01                   | 0.062                                                     | 0.107 ± 0.007         | Wilkinson <i>et al.</i> 1986 |
| 3114                        | 5       |         | phonolitic tephrite    | 4.72                   | 0.073                                                     | 0.107 ± 0.006         | Wilkinson <i>et al.</i> 1986 |
|                             |         |         |                        | 4.72                   | 0.070                                                     | 0.102 ± 0.005         | Wilkinson <i>et al.</i> 1986 |
| Meru West (2395 m)          |         |         |                        |                        |                                                           |                       |                              |
| 3930                        | 4       |         | phonolitic nephelinite | 4.97                   | 0.064                                                     | 0.090 ± 0.004         | Wilkinson <i>et al.</i> 1986 |
|                             |         |         |                        | 4.97                   | 0.056                                                     | 0.079 ± 0.004         | Wilkinson <i>et al.</i> 1986 |
| SW of Meru West (3885 m)    |         |         |                        |                        |                                                           |                       |                              |
| 3655                        | 3       |         | nephelinite            | 4.71                   | 0.054                                                     | 0.080 ± 0.005         | Wilkinson <i>et al.</i> 1986 |
|                             |         |         |                        | 4.71                   | 0.054                                                     | 0.080 ± 0.005         | Wilkinson <i>et al.</i> 1986 |
| Meru summit                 |         |         |                        |                        |                                                           |                       |                              |
| 3403                        | 2       |         | nephelinite            | 3.80                   | 0.037                                                     | 0.067 ± 0.008         | Wilkinson <i>et al.</i> 1986 |
|                             |         |         |                        | 3.80                   | 0.032                                                     | 0.059 ± 0.010         | Wilkinson <i>et al.</i> 1986 |
| <b>LLODNYO LOOLMURWAK</b>   |         |         |                        |                        |                                                           |                       |                              |
| 105                         | -2.8008 | 35.9908 | olivine nephelinite    | 1.64                   | 0.04                                                      | 0.15 ± 0.12           | Macintrye <i>et al.</i> 1974 |

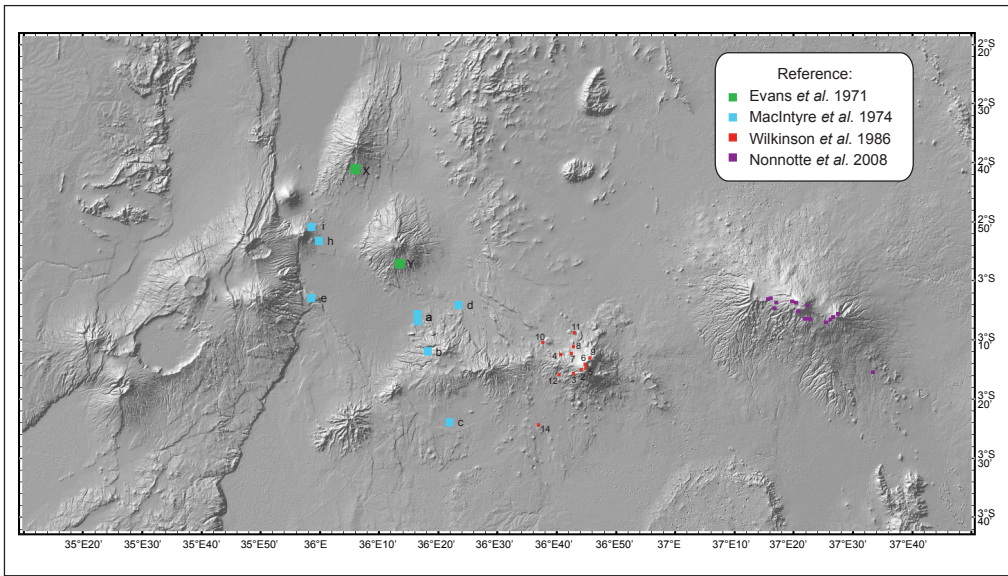

Distribution map of the samples reported without LAT-LONG information (difference spot size represent location uncertainty)
