# Supplementary material
Source: publisher figshare collection journal article supplement (https://geolsoc.figshare.com/articles/dataset/_/3453908)
Supplement: Supplementary file 3 [file 1]

## Appendix E –Examples of NTD calculated fractional crystallization

modes.

| Parent magma (P) <b>G93-2</b> |                        |                              |              |            |            |              |            |             |            |             |            |              |
|-------------------------------|------------------------|------------------------------|--------------|------------|------------|--------------|------------|-------------|------------|-------------|------------|--------------|
|                               | Coef                   | %Solid Min/Magma             |              |            |            |              |            |             |            |             |            |              |
|                               | 0.07                   | 39.4                         | OL           |            |            |              |            |             |            |             |            |              |
|                               | 0.107                  | 60.6                         | CPX          |            |            |              |            |             |            |             |            |              |
|                               | 0.821                  | Daughter(D) <b>10-GEL-20</b> |              |            |            |              |            |             |            |             |            |              |
|                               | <b>SiO2</b>            | <b>TiO2</b>                  | <b>Al2O3</b> | <b>FeO</b> | <b>MnO</b> | <b>MgO</b>   | <b>CaO</b> | <b>Na2O</b> | <b>K2O</b> | <b>P2O5</b> | <b>NiO</b> | <b>Cr2O3</b> |
| Daughter                      | 42.17                  | 4                            | 14.28        | 15.81      | 0.2        | 6.45         | 12.14      | 3.28        | 0.97       | 0.7         | 0          | 0            |
| Obs                           | 43.97                  | 3.26                         | 12.4         | 15.19      | 0.22       | 9.21         | 11.31      | 2.67        | 1.06       | 0.72        | 0          | 0            |
| Calc                          | 42.6                   | 3.45                         | 12.04        | 16.09      | 0.25       | 9.12         | 12.12      | 2.79        | 0.8        | 0.57        | 0.02       | 0.02         |
| Diff*Wt                       | 0.55                   | 0.19                         | 0.18         | 0.9        | 0.04       | 0.1          | 0.81       | 0.13        | 0.26       | 0.14        | 0.02       | 0.02         |
|                               | S <sup>2</sup> = 1.959 |                              |              |            |            |              |            |             |            |             |            |              |
|                               |                        | D                            | Obs(P)       | Calc(P)    | Diff       | 10-GEL-20(D) |            |             |            |             |            |              |
| <b>RB</b>                     |                        | 0                            | 24.8         | 8.04       | 16.8       | 9.79         |            |             |            |             |            |              |
| <b>SR</b>                     |                        | 0.07                         | 1100         | 971.9      | 128        | 1168         |            |             |            |             |            |              |
| <b>Y</b>                      |                        | 0.26                         | 27.7         | 28.6       | 0.86       | 33.1         |            |             |            |             |            |              |
| <b>ZR</b>                     |                        | 0.08                         | 161.5        | 126.6      | 34.9       | 151.8        |            |             |            |             |            |              |
| <b>NB</b>                     |                        | 0                            | 51.4         | 49.7       | 1.64       | 60.5         |            |             |            |             |            |              |
| <b>BA</b>                     |                        | 0                            | 484          | 325.7      | 158.3      | 396.6        |            |             |            |             |            |              |
| <b>LA</b>                     |                        | 0.03                         | 36.4         | 38.8       | 2.47       | 47           |            |             |            |             |            |              |
| <b>CE</b>                     |                        | 0.05                         | 94           | 68.4       | 25.6       | 82.4         |            |             |            |             |            |              |
| <b>PR</b>                     |                        | 0.09                         | 0            | 7.86       | 7.86       | 9.4          |            |             |            |             |            |              |
| <b>ND</b>                     |                        | 0.12                         | 50.3         | 35.5       | 14.8       | 42.2         |            |             |            |             |            |              |
| <b>SM</b>                     |                        | 0.19                         | 0            | 7.62       | 7.62       | 8.93         |            |             |            |             |            |              |
| <b>EU</b>                     |                        | 0.19                         | 0            | 2.28       | 2.28       | 2.67         |            |             |            |             |            |              |
| <b>GD</b>                     |                        | 0.18                         | 0            | 6.01       | 6.01       | 7.06         |            |             |            |             |            |              |
| <b>TB</b>                     |                        | 0.27                         | 0            | 0.94       | 0.94       | 1.09         |            |             |            |             |            |              |
| <b>DY</b>                     |                        | 0.2                          | 0            | 4.94       | 4.94       | 5.79         |            |             |            |             |            |              |
| <b>HO</b>                     |                        | 0.28                         | 0            | 0.95       | 0.95       | 1.1          |            |             |            |             |            |              |
| <b>ER</b>                     |                        | 0.18                         | 0            | 2.28       | 2.28       | 2.68         |            |             |            |             |            |              |
| <b>YB</b>                     |                        | 0.24                         | 0            | 1.81       | 1.81       | 2.11         |            |             |            |             |            |              |
| <b>LU</b>                     |                        | 0.24                         | 0            | 0.24       | 0.24       | 0.27         |            |             |            |             |            |              |
| <b>HF</b>                     |                        | 0.16                         | 0            | 3.65       | 3.65       | 4.31         |            |             |            |             |            |              |
| <b>TA</b>                     |                        | 0.01                         | 0            | 2.78       | 2.78       | 3.38         |            |             |            |             |            |              |
| <b>PB</b>                     |                        | 0.01                         | 4.41         | 2          | 2.41       | 2.43         |            |             |            |             |            |              |
| <b>TH</b>                     |                        | 0                            | 7.65         | 4.02       | 3.62       | 4.9          |            |             |            |             |            |              |
| <b>U</b>                      |                        | 0                            | 0            | 0.64       | 0.64       | 0.78         |            |             |            |             |            |              |

Parent magma (P) **MD93-7**

---

Coef %Solid Min/Magma  
 0.069 26.2 OL  
 0.193 73.8 CPX  
 0.737 Daughter(D) **MR226**

|          | SiO2  | TiO2 | Al2O3 | FeO   | MnO  | MgO   | CaO   | Na2O | K2O  | P2O5 | NiO  | Cr2O3 |
|----------|-------|------|-------|-------|------|-------|-------|------|------|------|------|-------|
| Daughter | 47.52 | 3.43 | 12.62 | 14.88 | 0.17 | 7.32  | 9.68  | 2.82 | 1.01 | 0.55 | 0    | 0     |
| Obs      | 47.9  | 2.33 | 10.91 | 13.98 | 0.22 | 10.73 | 10.49 | 2.29 | 0.85 | 0.31 | 0    | 0     |
| Calc     | 47.23 | 2.83 | 9.87  | 14.97 | 0.25 | 10.32 | 10.98 | 2.26 | 0.74 | 0.4  | 0.02 | 0.03  |
| Diff*Wt  | 0.27  | 0.5  | 0.52  | 1     | 0.03 | 0.41  | 0.49  | 0.03 | 0.1  | 0.09 | 0.02 | 0.03  |

S<sup>2</sup>= 2.01

|           | D    | Obs(P) | Calc(P) | Diff  | MR226(D) |
|-----------|------|--------|---------|-------|----------|
| <b>RB</b> | 0    | 18.7   | 16.3    | 2.43  | 22.1     |
| <b>SR</b> | 0.08 | 436.6  | 505.4   | 68.76 | 669.3    |
| <b>Y</b>  | 0.31 | 19.7   | 28.1    | 8.41  | 34.6     |
| <b>ZR</b> | 0.1  | 158.3  | 163.7   | 5.39  | 215.7    |
| <b>NB</b> | 0    | 36.4   | 30.7    | 5.73  | 41.6     |
| <b>BA</b> | 0    | 310.7  | 273.9   | 36.9  | 371.6    |
| <b>LA</b> | 0.04 | 24.6   | 37.8    | 13.2  | 50.7     |
| <b>CE</b> | 0.07 | 65.9   | 61      | 4.84  | 81.2     |
| <b>PR</b> | 0.11 | 0      | 9.11    | 9.11  | 12       |
| <b>ND</b> | 0.15 | 37.4   | 38.4    | 1.01  | 49.8     |
| <b>SM</b> | 0.24 | 0      | 7.67    | 7.67  | 9.68     |
| <b>EU</b> | 0.23 | 0      | 2.49    | 2.49  | 3.15     |
| <b>GD</b> | 0.22 | 0      | 7.93    | 7.93  | 10.1     |
| <b>TB</b> | 0.33 | 0      | 1.03    | 1.03  | 1.26     |
| <b>DY</b> | 0.24 | 0      | 4.98    | 4.98  | 6.28     |
| <b>HO</b> | 0.33 | 0      | 0.94    | 0.94  | 1.15     |
| <b>ER</b> | 0.21 | 0      | 2.23    | 2.23  | 2.83     |
| <b>YB</b> | 0.28 | 0      | 2       | 2     | 2.49     |
| <b>LU</b> | 0.28 | 0      | 0.27    | 0.27  | 0.33     |
| <b>HF</b> | 0.2  | 0      | 4.16    | 4.16  | 5.31     |
| <b>TA</b> | 0.01 | 0      | 1.98    | 1.98  | 2.68     |
| <b>PB</b> | 0.01 | 4.92   | 2.45    | 2.47  | 3.31     |
| <b>TH</b> | 0.01 | 5.9    | 11.1    | 5.19  | 15       |
| <b>U</b>  | 0    | 0      | 0.62    | 0.62  | 0.84     |

---

Parent magma (P) **BD333**

---

Coef %Solid Min/Magma  
 0.155 42.6 OL  
 0.208 57.4 CPX  
 0.635 Daughter(D) **10-KTM-02**

|          | SiO2  | TiO2 | Al2O3 | FeO   | MnO  | MgO   | CaO  | Na2O | K2O  | P2O5 | NiO  | Cr2O3 |
|----------|-------|------|-------|-------|------|-------|------|------|------|------|------|-------|
| Daughter | 51.22 | 3.28 | 14.33 | 14.14 | 0.16 | 3.39  | 7.47 | 3.9  | 1.52 | 0.6  | 0    | 0     |
| Obs      | 47.36 | 2.74 | 11.36 | 14.53 | 0.17 | 10.75 | 8.68 | 2.84 | 1.02 | 0.54 | 0    | 0     |
| Calc     | 48.68 | 2.4  | 9.72  | 15.54 | 0.29 | 10.21 | 8.92 | 2.67 | 0.97 | 0.38 | 0.03 | 0.03  |
| Diff*Wt  | 0.52  | 0.33 | 0.82  | 1     | 0.13 | 0.55  | 0.24 | 0.18 | 0.05 | 0.16 | 0.03 | 0.03  |

S<sup>2</sup> = 2.502

|           | D    | Obs(P) | Calc(P) | Diff  | 10-KTM-02(D) |
|-----------|------|--------|---------|-------|--------------|
| <b>RB</b> | 0    | 22.6   | 18.7    | 3.86  | 29.4         |
| <b>SR</b> | 0.06 | 638.6  | 422.7   | 216   | 646.8        |
| <b>Y</b>  | 0.24 | 24.5   | 35.4    | 10.86 | 49.9         |
| <b>ZR</b> | 0.08 | 194.2  | 249     | 54.77 | 378.9        |
| <b>NB</b> | 0    | 44.1   | 33.2    | 11    | 52.2         |
| <b>BA</b> | 0    | 467.9  | 327.7   | 140.3 | 515.8        |
| <b>LA</b> | 0.03 | 44.1   | 37      | 7.18  | 57.4         |
| <b>CE</b> | 0.05 | 124.6  | 67.9    | 56.7  | 104.4        |
| <b>PR</b> | 0.09 | 0      | 9.09    | 9.09  | 13.8         |
| <b>ND</b> | 0.12 | 47.1   | 39.1    | 8.04  | 58.3         |
| <b>SM</b> | 0.18 | 0      | 8.8     | 8.8   | 12.7         |
| <b>EU</b> | 0.18 | 0      | 2.49    | 2.49  | 3.61         |
| <b>GD</b> | 0.17 | 0      | 8.4     | 8.4   | 12.2         |
| <b>TB</b> | 0.26 | 0      | 1.22    | 1.22  | 1.71         |
| <b>DY</b> | 0.19 | 0      | 6.29    | 6.29  | 9.09         |
| <b>HO</b> | 0.26 | 0      | 1.25    | 1.25  | 1.75         |
| <b>ER</b> | 0.17 | 0      | 2.96    | 2.96  | 4.32         |
| <b>YB</b> | 0.23 | 0      | 2.39    | 2.39  | 3.39         |
| <b>LU</b> | 0.23 | 0      | 0.32    | 0.32  | 0.46         |
| <b>HF</b> | 0.16 | 0      | 6.55    | 6.55  | 9.61         |
| <b>TA</b> | 0.01 | 0      | 2.27    | 2.27  | 3.56         |
| <b>PB</b> | 0.01 | 4.91   | 2.82    | 2.08  | 4.44         |
| <b>TH</b> | 0    | 3.92   | 4.26    | 0.34  | 6.69         |
| <b>U</b>  | 0    | 0      | 0.88    | 0.88  | 1.38         |

---

Parent magma (P) **10-BRK-06**

Coef %Solid Min/Magma  
 0.022 5.8 OL  
 0.328 85.5 CPX  
 0.033 8.7 MT  
 0.616 Daughter(D) **10-BRK-16**

|                  | SiO2  | TiO2 | Al2O3 | FeO   | MnO  | MgO  | CaO   | Na2O | K2O  | P2O5 | NiO | Cr2O3 |
|------------------|-------|------|-------|-------|------|------|-------|------|------|------|-----|-------|
| Daughter         | 48.89 | 3.74 | 14.62 | 14.57 | 0.17 | 4.28 | 7.74  | 3.8  | 1.54 | 0.65 | 0   | 0     |
| Obs              | 46.38 | 3.31 | 11.31 | 15.43 | 0.19 | 8    | 11.44 | 2.48 | 0.93 | 0.54 | 0   | 0     |
| Calc             | 47.36 | 3.39 | 10.09 | 15.48 | 0.28 | 7.88 | 11.28 | 2.64 | 0.95 | 0.4  | 0   | 0     |
| Diff*Wt          | 0.39  | 0.08 | 0.61  | 0.05  | 0.09 | 0.12 | 0.16  | 0.17 | 0.02 | 0.14 | 0   | 0     |
| S <sup>2</sup> = | 0.63  |      |       |       |      |      |       |      |      |      |     |       |

|           | D    | Obs(P) | Calc(P) | Diff  | 10-BRK-16(D) |
|-----------|------|--------|---------|-------|--------------|
| <b>RB</b> | 0    | 20.7   | 17.1    | 3.64  | 27.7         |
| <b>SR</b> | 0.09 | 612    | 554.5   | 57.4  | 860.4        |
| <b>Y</b>  | 0.36 | 31     | 25.2    | 5.82  | 34.3         |
| <b>ZR</b> | 0.2  | 236.7  | 214.1   | 22.6  | 315.9        |
| <b>NB</b> | 0    | 53.3   | 35.7    | 17.5  | 57.9         |
| <b>CS</b> | 0    | 0.1    | 0.12    | 0.02  | 0.2          |
| <b>BA</b> | 0    | 378.2  | 658.3   | 280.2 | 1068         |
| <b>LA</b> | 0.04 | 45.2   | 31.7    | 13.5  | 50.4         |
| <b>CE</b> | 0.08 | 91     | 68.7    | 22.2  | 107.5        |
| <b>PR</b> | 0.13 | 11.5   | 9.1     | 2.4   | 13.9         |
| <b>ND</b> | 0.17 | 46.4   | 37      | 9.34  | 55.3         |
| <b>SM</b> | 0.28 | 9.33   | 7.62    | 1.72  | 10.8         |
| <b>EU</b> | 0.27 | 2.95   | 2.48    | 0.46  | 3.54         |
| <b>GD</b> | 0.26 | 8.94   | 7.07    | 1.87  | 10.1         |
| <b>TB</b> | 0.38 | 1.28   | 1.02    | 0.26  | 1.38         |
| <b>DY</b> | 0.28 | 6.88   | 5.21    | 1.66  | 7.38         |
| <b>HO</b> | 0.39 | 1.08   | 0.95    | 0.13  | 1.28         |
| <b>ER</b> | 0.25 | 2.85   | 2.26    | 0.59  | 3.25         |
| <b>YB</b> | 0.31 | 2.26   | 1.9     | 0.36  | 2.66         |
| <b>LU</b> | 0.32 | 0.29   | 0.28    | 0.01  | 0.39         |
| <b>HF</b> | 0.24 | 5.9    | 5.04    | 0.86  | 7.28         |
| <b>TA</b> | 0.1  | 3.34   | 2.16    | 1.18  | 3.34         |
| <b>PB</b> | 0.02 | 3.05   | 3.24    | 0.19  | 5.21         |
| <b>TH</b> | 0.01 | 5.21   | 3.91    | 1.3   | 6.3          |
| <b>U</b>  | 0.01 | 0.98   | 0.79    | 0.19  | 1.28         |

Parent magma (P) **MR226**

Coef %Solid Min/Magma  
 0.274 52.2 CPX  
 0.057 10.9 MT  
 0.194 36.9 AMPH  
 0.475 Daughter(D) -**MON-01**

|          | SiO2  | TiO2 | Al2O3 | FeO   | MnO  | MgO  | CaO  | Na2O | K2O  | P2O5 | NiO  | Cr2O3 |
|----------|-------|------|-------|-------|------|------|------|------|------|------|------|-------|
| Daughter | 53.7  | 2.57 | 17.21 | 10.85 | 0.17 | 2.12 | 4.41 | 4.48 | 3.98 | 0.5  | 0    | 0     |
| Obs      | 47.52 | 3.43 | 12.62 | 14.88 | 0.17 | 7.32 | 9.68 | 2.82 | 1.01 | 0.55 | 0    | 0     |
| Calc     | 47.09 | 3.79 | 11.46 | 14.71 | 0.32 | 7.22 | 9.79 | 2.94 | 2.11 | 0.24 | 0.02 | 0.36  |
| Diff*Wt  | 0.17  | 0.35 | 0.58  | 0.16  | 0.15 | 0.1  | 0.11 | 0.11 | 1.1  | 0.31 | 0.02 | 0.36  |

S<sup>2</sup> = 2.014

|           | D    | Obs(P) | Calc(P) | Diff  | 10-MON-01(D) |
|-----------|------|--------|---------|-------|--------------|
| <b>RB</b> | 0.07 | 22.1   | 57.9    | 35.88 | 116          |
| <b>SR</b> | 0.17 | 669.3  | 688.9   | 19.69 | 1280         |
| <b>Y</b>  | 0.23 | 34.6   | 16.3    | 18.4  | 28.9         |
| <b>ZR</b> | 0.26 | 215.7  | 247.6   | 31.83 | 430.1        |
| <b>NB</b> | 0.05 | 41.6   | 88.3    | 46.76 | 178.7        |
| <b>CS</b> | 0.01 | 0      | 0.35    | 0.35  | 0.73         |
| <b>BA</b> | 0.08 | 371.6  | 665.9   | 294.2 | 1317         |
| <b>LA</b> | 0.06 | 50.7   | 67.3    | 16.63 | 135.1        |
| <b>CE</b> | 0.1  | 81.2   | 107.3   | 26.06 | 209.7        |
| <b>PR</b> | 0.15 | 12     | 13.7    | 1.7   | 25.6         |
| <b>ND</b> | 0.21 | 49.8   | 48.5    | 1.32  | 87.1         |
| <b>SM</b> | 0.35 | 9.68   | 7.83    | 1.85  | 12.7         |
| <b>EU</b> | 0.35 | 3.15   | 2.26    | 0.89  | 3.66         |
| <b>GD</b> | 0.34 | 10.1   | 6.32    | 3.74  | 10.3         |
| <b>TB</b> | 0.43 | 1.26   | 0.8     | 0.47  | 1.22         |
| <b>DY</b> | 0.37 | 6.28   | 3.93    | 2.35  | 6.28         |
| <b>HO</b> | 0.44 | 1.15   | 0.72    | 0.43  | 1.09         |
| <b>ER</b> | 0.32 | 2.83   | 1.69    | 1.14  | 2.8          |
| <b>YB</b> | 0.32 | 2.49   | 1.4     | 1.09  | 2.32         |
| <b>LU</b> | 0.34 | 0.33   | 0.2     | 0.13  | 0.33         |
| <b>HF</b> | 0.31 | 5.31   | 6.27    | 0.96  | 10.5         |
| <b>TA</b> | 0.17 | 2.68   | 5.37    | 2.69  | 9.93         |
| <b>PB</b> | 0.04 | 3.31   | 8.97    | 5.66  | 18.4         |
| <b>TH</b> | 0.02 | 15     | 14.6    | 0.39  | 30.5         |
| <b>U</b>  | 0.02 | 0.84   | 0.38    | 0.46  | 0.8          |

Parent magma (P) **10-GEL-20**

---

Coef %Solidin/Magma  
 0.216 24.3 CPX  
 0.136 15.3 MT  
 0.271 30.5 PLAG  
 0.245 27.6 AMPH  
 0.021 2.3 APAT  
 0.111 Daughter(D) **10-GEL-11**

|                  | SiO2  | TiO2 | Al2O3 | FeO   | MnO  | MgO  | CaO   | Na2O | K2O  | P2O5 | NiO  | Cr2O3 |
|------------------|-------|------|-------|-------|------|------|-------|------|------|------|------|-------|
| Daughter         | 59.05 | 0.46 | 20.32 | 5.21  | 0.13 | 0.42 | 1.45  | 7.95 | 4.96 | 0.06 | 0    | 0     |
| Obs              | 42.17 | 4    | 14.28 | 15.81 | 0.2  | 6.45 | 12.14 | 3.28 | 0.97 | 0.7  | 0    | 0     |
| Calc             | 42.31 | 4.25 | 13.97 | 15.68 | 0.34 | 6.37 | 12.13 | 3.21 | 0.97 | 0.01 | 0.01 | 0.76  |
| Diff*Wt          | 0.05  | 0.25 | 0.16  | 0.13  | 0.15 | 0.08 | 0.01  | 0.07 | 0    | 0.69 | 0.01 | 0.76  |
| S <sup>2</sup> = | 1.184 |      |       |       |      |      |       |      |      |      |      |       |

|           | D    | Obs(P) | Calc(P) | Diff  | 10-GEL-11(D) |
|-----------|------|--------|---------|-------|--------------|
| <b>RB</b> | 0.09 | 9.79   | 16.9    | 7.12  | 124.2        |
| <b>SR</b> | 0.64 | 1168   | 100.7   | 1068  | 222.5        |
| <b>Y</b>  | 0.14 | 33.1   | 6.48    | 26.6  | 43           |
| <b>ZR</b> | 0.29 | 151.8  | 140.6   | 11.2  | 664.5        |
| <b>NB</b> | 0.07 | 60.5   | 28.2    | 32.3  | 218.9        |
| <b>BA</b> | 0.15 | 396.6  | 109.2   | 287.4 | 703.3        |
| <b>LA</b> | 0.26 | 47     | 19      | 28    | 95.8         |
| <b>CE</b> | 0.34 | 82.4   | 35.9    | 46.6  | 153.7        |
| <b>PR</b> | 0.4  | 9.4    | 4.11    | 5.29  | 15.3         |
| <b>ND</b> | 0.48 | 42.2   | 15.5    | 26.7  | 48.6         |
| <b>SM</b> | 0.57 | 8.93   | 3.09    | 5.84  | 7.94         |
| <b>EU</b> | 0.6  | 2.67   | 0.75    | 1.93  | 1.82         |
| <b>GD</b> | 0.61 | 7.06   | 4.4     | 2.66  | 10.4         |
| <b>TB</b> | 0.63 | 1.09   | 1.07    | 0.01  | 2.4          |
| <b>DY</b> | 0.58 | 5.79   | 3.29    | 2.49  | 8.33         |
| <b>HO</b> | 0.59 | 1.1    | 0.59    | 0.51  | 1.44         |
| <b>ER</b> | 0.46 | 2.68   | 1.17    | 1.51  | 3.88         |
| <b>YB</b> | 0.4  | 2.11   | 1.07    | 1.04  | 3.97         |
| <b>LU</b> | 0.3  | 0.27   | 0.12    | 0.15  | 0.58         |
| <b>HF</b> | 0.23 | 4.31   | 2.68    | 1.63  | 14.6         |
| <b>TA</b> | 0.23 | 3.38   | 2.27    | 1.11  | 12.2         |
| <b>PB</b> | 0.85 | 2.43   | 13.4    | 10.98 | 18.8         |
| <b>TH</b> | 0.14 | 4.9    | 3.5     | 1.4   | 23.1         |
| <b>U</b>  | 0.16 | 0.78   | 0.25    | 0.53  | 1.59         |

---
